# Supplementary material
Source: PubMed Central journal article supplement (PMC5335591)
Supplement: 10.1194_P070425_jlr.P070425-1.pdf [file 10.1194_P070425_jlr.P070425-1.pdf]

## Supplemental Material

### **Prognostic roles of tetrahydroxy bile acids in infantile intrahepatic cholestasis**

Chee-Seng Lee<sup>1,2</sup>, Akihiko Kimura<sup>3</sup>, Jia-Feng Wu<sup>1</sup>, Yen-Hsuan Ni<sup>1,4</sup>, Hong-Yuan Hsu<sup>1,5</sup>, Mei-Hwei Chang<sup>1,4</sup>, Hiroshi Nittono<sup>6</sup>, Huey-Ling Chen<sup>1,4,5</sup>

1. Department of Paediatrics, National Taiwan University Hospital, Taipei, Taiwan
2. Department of Paediatrics, Taipei Tzu Chi Hospital, Buddhist Tzu Chi Medical Foundation
3. Department of Paediatrics and Child Health, Kurume University School of Medicine, Japan
4. Hepatitis Research Centre, National Taiwan University Hospital, Taipei, Taiwan
5. Department of Medical Education and Bioethics, Graduate Institute of Medical Education and Bioethics, National Taiwan University College of Medicine, Taipei, Taiwan
6. Junshin Clinic Bile Acid Institute, Meguro-ku, Tokyo, Japan

#### **\*Correspondence and Reprint Requests:**

Huey-Ling Chen, MD, PhD,

Professor, Department of Paediatrics, Department of Medical Education and Bioethics, National Taiwan University College of Medicine.

Address: National University Children's Hospital, 17F, No. 8, Chung-Shan South Rd, Taipei 100, Taiwan.

Fax: +886-2-23114592.

Email: [hueyling@ntu.edu.tw](mailto:hueyling@ntu.edu.tw)

#### **Running title:**

Association of tetrahydroxy bile acids with good outcome

Supplemental Figure S1. Urinary tetrahydroxy bile acids (THBAs) proportion in patients with different etiologies of infantile cholestasis

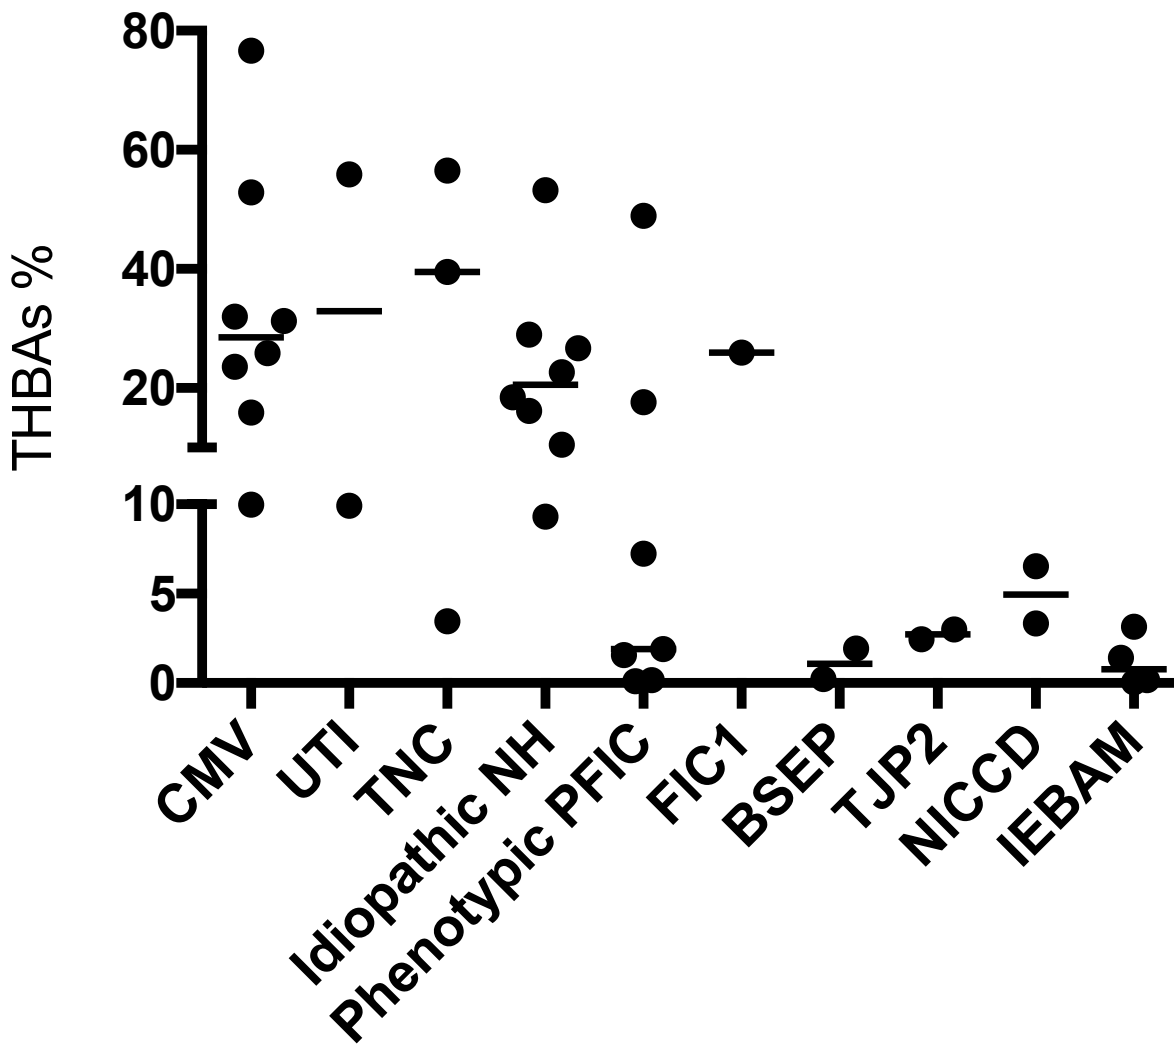

CMV, cytomegalovirus; UTI, urinary tract infection; TNC, transient neonatal cholestasis (*SLC25A13* heterozygous mutation or *VPS33B* heterozygous mutation); NH, neonatal hepatitis; PFIC, progressive familial intrahepatic cholestasis; FIC1, familial intrahepatic cholestasis 1 deficiency; BSEP, bile salt export pump deficiency; TJP2, tight junction protein 2 deficiency; NICCD: neonatal cholestasis caused by citrin deficiency, IEBAM: inborn error of bile acid metabolism (*CYP7B1* mutation or *AKR1D1* mutation), PNAC: parenteral nutrition-associated cholestasis

Supplemental Table S1. The urinary bile acids analysed between good prognosis (jaundice free before one-year-old) patients and poor prognosis (persistence of jaundice after one-year-old) patients.

|                    | Good prognosis                    | Poor prognosis                    | <i>P</i> value* |
|--------------------|-----------------------------------|-----------------------------------|-----------------|
|                    | μmole/mmmole Cre<br>(% over UTBA) | μmole/mmmole Cre<br>(% over UTBA) |                 |
| UTBA <sub>s</sub>  | 37.16(7.08-193.14)                | 87.26(16.17-571.06)               | 0.0153          |
| CBA <sub>s</sub>   | 15.75(1.99-147.65)                | 15.75(1.99-147.65)                | 0.7349          |
|                    | 41.15(13.52-76.45)                | 41.15(13.52-76.45)                |                 |
| CA                 | 9.64(0.67-140.85)                 | 8.18(0.38-371.47)                 | 0.0409          |
|                    | 22.35(6.47-72.92)                 | 11.82(0.91-65.05)                 |                 |
| CDCA               | 5.56(0.22-20.02)                  | 14.20(0.31-185.79)                | 0.3673          |
|                    | 11.25(1.2-44.28)                  | 20.57(0.37-52.99)                 |                 |
| DCA                | 0(0-0.03)                         | 0(0-0.31)                         | 0.0058          |
|                    | 0(0-0.09)                         | 0(0-0.32)                         |                 |
| LCA                | 0(0-0.1)                          | 0(0-0.4)                          | 0.7202          |
|                    | 0(0-0.2)                          | 0(0-0.66)                         |                 |
| THBA <sub>s</sub>  | 13.17(0.82-92.43)                 | 1.22(0.05-83.67)                  | <0.0001         |
|                    | 25.89(3.45-76.73)                 | 1.93(0.05-48.90)                  |                 |
| CA-1β-ol           | 10.13(0.51-65.26)                 | 0.85(0.03-67.64)                  | <0.0001         |
|                    | 19.63(2.15-64.15)                 | 1.57(0.03-39.53)                  |                 |
| CA-2β-ol           | 0.1(0-4.22)                       | 0(0-0.87)                         | 0.0088          |
|                    | 0.21(0-2.55)                      | 0(0-0.72)                         |                 |
| CA-3β,4β-diol      | 0(0-0.25)                         | 0(0-0.54)                         | 0.3359          |
|                    | 0(0-0.94)                         | 0(0-0.32)                         |                 |
| CA-4β-ol           | 0.16(0-8.21)                      | 0(0-1.01)                         | 0.0024          |
|                    | 0.28(0-4.97)                      | 0(0-1.17)                         |                 |
| CA-6α-ol           | 2.24(0.21-14.74)                  | 0.29(0-13.61)                     | <0.0001         |
|                    | 5.8(0.88-20.52)                   | 0.39(0-11.65)                     |                 |
| TRHBA <sub>s</sub> | 5.66(1.56-22.8)                   | 3.46(0.09-21.36)                  | 0.0053          |
|                    | 14.1(4.48-36.58)                  | 2.95(0.1-31.99)                   |                 |
| UBA <sub>s</sub>   | 1.41(0.17-8.70)                   | 4.60(0.79-99.28)                  | 0.0206          |
|                    | 4.21(0.54-13.89)                  | 6.62(0.5-97.74)                   |                 |
| KBA <sub>s</sub>   | 3.83(0-15.99)                     | 12.7(0.19-115.00)                 | 0.0165          |
|                    | 8.28(0-18.56)                     | 20.66(0.21-95.04)                 |                 |

UTBAs, urinary total bile acids; CBAs, common bile acids; CA, Cholic acid; CDCA, chenodeoxycholic acid; DCA, deoxycholic acid; LCA, lithocholic acid; THBAs, tetrahydroxy bile acids; CA-1 $\beta$ -ol, 1 $\beta$ , 3 $\alpha$ , 7 $\alpha$ , 12 $\alpha$ -hydroxylated bile acid; CA-2 $\beta$ -ol, 2 $\beta$ , 3 $\alpha$ , 7 $\alpha$ , 12 $\alpha$ -hydroxylated bile acid; CA-3 $\beta$ -4 $\beta$ -diol, 3 $\beta$ , 4 $\beta$ , 7 $\alpha$ , 12 $\alpha$ -hydroxylated bile acid; CA-4 $\beta$ -ol, 3 $\alpha$ , 4 $\beta$ , 7 $\alpha$ , 12 $\alpha$ -hydroxylated bile acid; CA-6 $\alpha$ -ol, 3 $\alpha$ , 6 $\alpha$ , 7 $\alpha$ , 12 $\alpha$ -hydroxylated bile acid; TRHBAs, trihydroxy bile acids; UBAs, unsaturated bile acids; KBAs, ketonic bile acids; [%], proportion over urinary total bile acids; \* *p* value of [%] of urine bile acids between two group of patients.

Supplemental Table S2. Urinary bile acid compositions in patients with genetic cholestatic diseases.

|         | FIC1 deficiency      | BSEP deficiency      | TJP2 deficiency      |
|---------|----------------------|----------------------|----------------------|
|         | (n=3)                | (n=4)                | (n=3)                |
|         | μmole/mmmole Cre     | μmole/mmmole Cre     | μmole/mmmole Cre     |
|         | [% of UTBA]          | [% of UTBA]          | [% of UTBA]          |
| UTBA    | 59.47(57.05-73.78)   | 91.07(57.74-176.13)  | 41.46(30.27-93.30)   |
| CBAAs   | 32.48(26.06-40.56)   | 65.17(13.92-104.32)  | 28.40(21.49-35.90)   |
|         | [44.03(43.82-71.10)] | [68.66(59.23-75.08)] | [68.66(38.48-71.00)] |
| CA      | 16.47(14.59-25.08)   | 43.98(6.88-68.38)    | 7.87(6.43-15.20)     |
|         | [27.69(19.77-43.96)] | [37.54(35.60-54.18)] | [16.29(15.51-25.99)] |
| CDCA    | 15.40(9.48-17.83)    | 20.98(6.95-35.62)    | 20.60(10.57-21.97)   |
|         | [24.17(15.59-27.00)] | [24.28(20.23-36.62)] | [34.93(22.08-52.99)] |
| THBAAs  | 19.18(4.28-22.16)    | 1.62(0.40-2.40)      | 1.24(0.12-19.00)     |
|         | [26.00(7.51-37.26)]  | [2.94(0.23-5.06)]    | [2.47(0.38-2.99)]    |
| TRHBAAs | 6.09(3.35-16.86)     | 0.58(0.45-6.20)      | 1.10(0.30-16.70)     |
|         | [10.24(5.87-22.85)]  | [1.62(0.45-2.37)]    | [2.65(0.98-17.90)]   |
| UBAAs   | 5.06(3.00-5.06)      | 7.88(1.66-12.27)     | 3.90(1.23-8.00)      |
|         | [8.51(4.07-8.82)]    | [8.27(6.97-10.49)]   | [8.57(4.07-9.41)]    |
| KBAAs   | 2.07(0.05-3.79)      | 12.27(1.96-58.18)    | 6.74(6.20-30.40)     |
|         | [2.81(0.08-6.64)]    | 15.41(10.21-33.03)   | [20.49(16.26-32.58)] |

FIC1, familial intrahepatic cholestasis 1; BSEP, bile salt export pump; TJP2, tight junction protein 2; IEBAM, inborn error of bile acid metabolism ( $7\alpha$ -hydroxylase deficiency and  $\Delta 4$ -3-oxosteroid  $5\beta$ -reductase deficiency); UTBA, urinary total bile acid; CBAAs, common bile acid; CA, cholic acid; CDCA, chenodeoxycholic acid; THBAAs, tetrahydroxy bile acids; TRHBAAs, trihydroxy bile acids; UBAAs, unsaturated bile acids; KBAAs, ketonic bile acids.
